# Supplementary material for: Beer or Ethanol Effects on the Body Composition Response to High-Intensity Interval Training. The BEER-HIIT Study
Source: PubMed Central journal article supplement (PMC6521009; doi:10.3390/nu11040909), 2019-04-23
Supplement: nutrients-11-00909-s001.pdf [file nutrients-11-00909-s001.pdf]

## SUPPLEMENTARY MATERIAL

**Table S1.** Changes in body composition outcomes adjusted by baseline values (Model 1) adjusted by baseline values and sex (Model 2), by baseline values and age (Model 3).

|                                           |         | Analysis of covariance P value |               |              |
|-------------------------------------------|---------|--------------------------------|---------------|--------------|
|                                           |         | F                              | P             | $\eta^2$     |
| Fat mass (kg)                             | Model 1 | 1.721                          | 0.156         | 0.094        |
|                                           | Model 2 | 1.698                          | 0.161         | 0.095        |
|                                           | Model 3 | 1.943                          | 0.114         | 0.107        |
| Waist Circumference                       | Model 1 | <b>3.053</b>                   | <b>0.023</b>  | <b>0.156</b> |
|                                           | Model 2 | <b>2.774</b>                   | <b>0.034</b>  | <b>0.146</b> |
|                                           | Model 3 | <b>3.064</b>                   | <b>0.022</b>  | <b>0.159</b> |
| Lean mass (kg)                            | Model 1 | <b>6.683</b>                   | <b>≤0.001</b> | <b>0.288</b> |
|                                           | Model 2 | <b>6.604</b>                   | <b>≤0.001</b> | <b>0.289</b> |
|                                           | Model 3 | <b>6.283</b>                   | <b>≤0.001</b> | <b>0.279</b> |
| Fat mass (%)                              | Model 1 | <b>3.660</b>                   | <b>0.009</b>  | <b>0.182</b> |
|                                           | Model 2 | <b>3.459</b>                   | <b>0.013</b>  | <b>0.175</b> |
|                                           | Model 3 | <b>3.697</b>                   | <b>0.009</b>  | <b>0.185</b> |
| Visceral adipose tissue (g)               | Model 1 | 0.652                          | 0.627         | 0.038        |
|                                           | Model 2 | 0.503                          | 0.733         | 0.030        |
|                                           | Model 3 | 0.688                          | 0.603         | 0.041        |
| Bone mineral density (g/cm <sup>2</sup> ) | Model 1 | 0.572                          | 0.684         | 0.034        |
|                                           | Model 2 | 0.563                          | 0.690         | 0.033        |
|                                           | Model 3 | 0.634                          | 0.640         | 0.038        |
